# Supplementary material
Source: PubMed Central journal article supplement (PMC6690033)
Supplement: pnas.1902902116.sapp.pdf [file pnas.1902902116.sapp.pdf]

## Supplementary Information for

### **Human Species-Specific Loss of CMP-*N*-acetylneuraminic Acid Hydroxylase Enhances Atherosclerosis via Intrinsic and Extrinsic Mechanisms**

Kunio Kawanishi<sup>a,b,1</sup>, Chirag Dhar<sup>a,b</sup>, Raymond Do<sup>a,c</sup>, Nissi Varki<sup>a,c</sup>,  
Philip L.S.M. Gordts<sup>a,2</sup> and Ajit Varki<sup>a,b,d,e,2</sup>

<sup>a</sup>Glycobiology Research and Training Center, Departments of <sup>b</sup>Cellular & Molecular Medicine, <sup>c</sup>Pathology, <sup>d</sup>Medicine, and <sup>e</sup>Center for Academic Research and Training in Anthropogeny, University of California, San Diego, La Jolla, CA 92093

<sup>1</sup>Current Address: Kidney and Vascular Pathology, Faculty of Medicine, University of Tsukuba, Ibaraki, 305-8575, Japan

<sup>2</sup>To whom correspondence: Ajit Varki (lead contact) or Philip L.S.M. Gordts  
Email: [avarki@ucsd.edu](mailto:avarki@ucsd.edu) (lead contact) or [pgordts@ucsd.edu](mailto:pgordts@ucsd.edu)

#### **This section includes:**

Figure. S1 to S8  
Table. S1

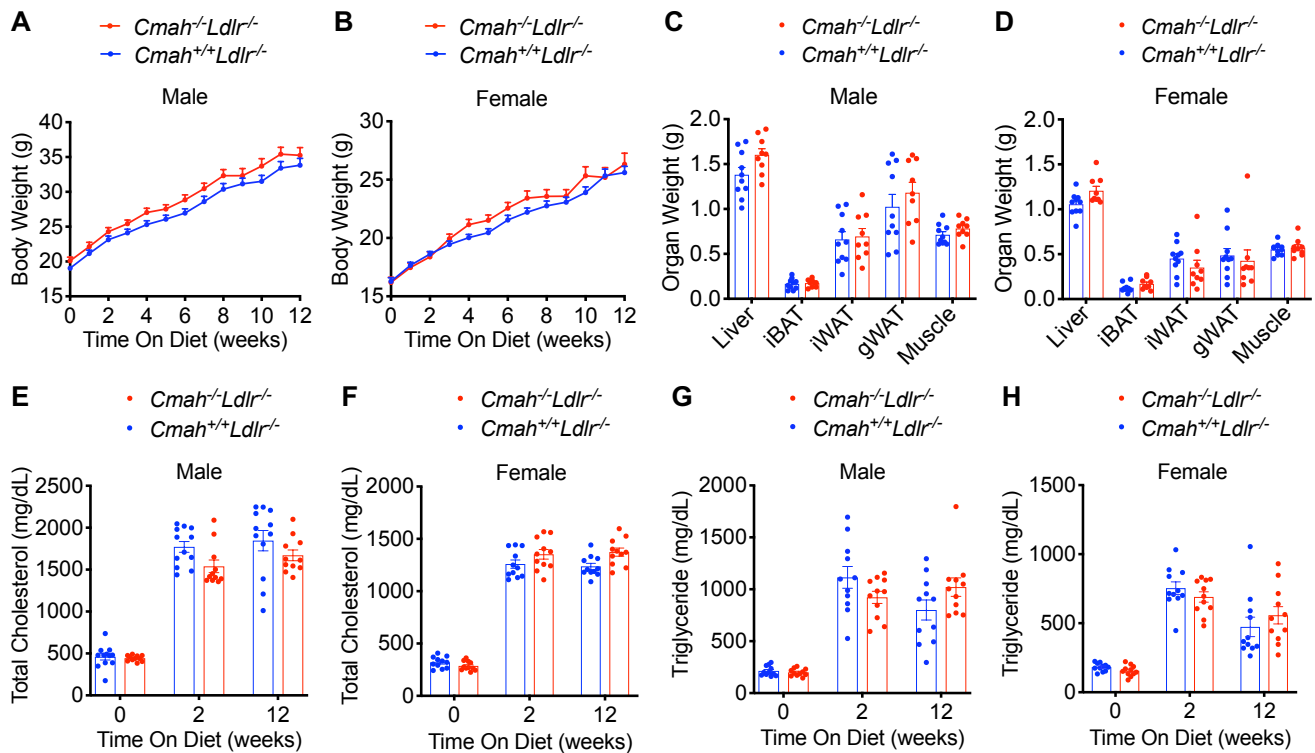

**Fig. S1 *Cmah*<sup>-/-</sup>*Ldlr*<sup>-/-</sup> does not show any differences in body weight, organ weight, and hyperlipidemia after HFD feeding in comparison with *Cmah*<sup>+/+</sup>*Ldlr*<sup>-/-</sup>.**

6 week old *Cmah*<sup>+/+</sup>*Ldlr*<sup>-/-</sup> and *Cmah*<sup>-/-</sup>*Ldlr*<sup>-/-</sup> male and female mice were fed a soy-based (free of Sialic acids, Sias) high fat diet (HFD) for 12 weeks. **(A), (B)** Graphical representation of body weight changes (male and female, n = 14 - 16). **(C), (D)** Organs weight at 12 weeks: liver; interscapular brown adipose tissue, iBAT; inguinal subcutaneous white adipose tissue, iWAT; gonadal white adipose tissue, gWAT; biceps femoris muscle (male and female, n = 9 - 10). **(E), (F)** Plasma total cholesterol and **(G), (H)** triglyceride level (male and female, n = 10 - 12). Mean values ± SEM.

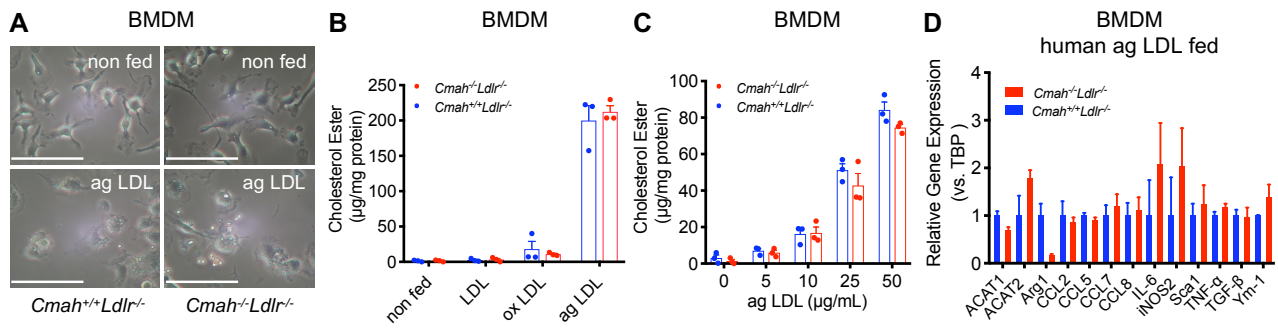

**Fig. S2 In vitro conversion to foam cells using mice BMDM and human LDL.**

**(A)** Bone marrow derived macrophage (BMDM) and BMDM fed with aggregated human LDL (ag LDL) from *Cmah<sup>-/-</sup>Ldlr<sup>-/-</sup>* and *Cmah<sup>+/+</sup>Ldlr<sup>-/-</sup>* female mice (8-12 weeks age, soy-based control diet fed). (Scale bars, 100 µm.) **(B)** Cholesterol ester levels in BMDM after a 24 hr incubation with 0 or 50 mg/ml of human LDL, oxidized LDL (ox LDL), and ag LDL (female, n = 3 each). **(C)** Cholesterol ester levels in BMDM after a 24 hr incubation with different concentrations of human ag LDL (female, n = 3 each). **(D)** Expression of cytokines in BMDM after a 24 hr incubation with 50 mg/ml ag LDL (female, n = 4 each). Mean values ± SEM.

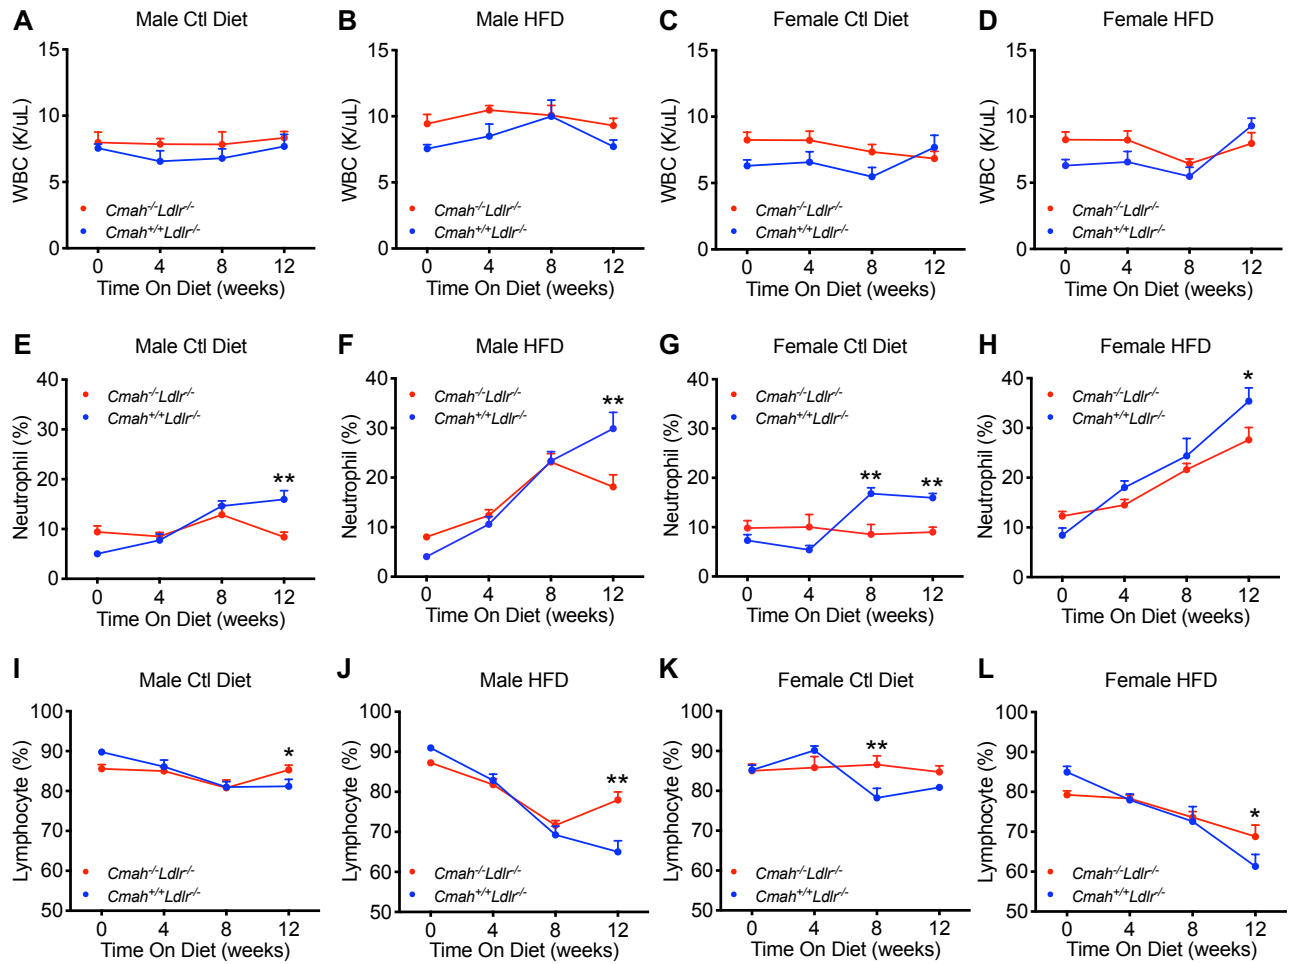

**Fig. S3 Inflammatory cell population in peripheral blood.**

6 week old  $Cmah^{+/+}Ldlr^{-/-}$  and  $Cmah^{-/-}Ldlr^{-/-}$  male and female mice were fed a soy-based (Sias free) control diet or soy-based high fat diet (HFD) for 12 weeks. (A) - (D) Peripheral white blood cell population in blood, (E) - (H) neutrophil population, (I) - (L) lymphocyte population during control diet or HFD feeding for 12 weeks in (male and female, n = 10 each). Mean values  $\pm$  SEM, \* $P < 0.05$  and \*\* $P < 0.01$ .

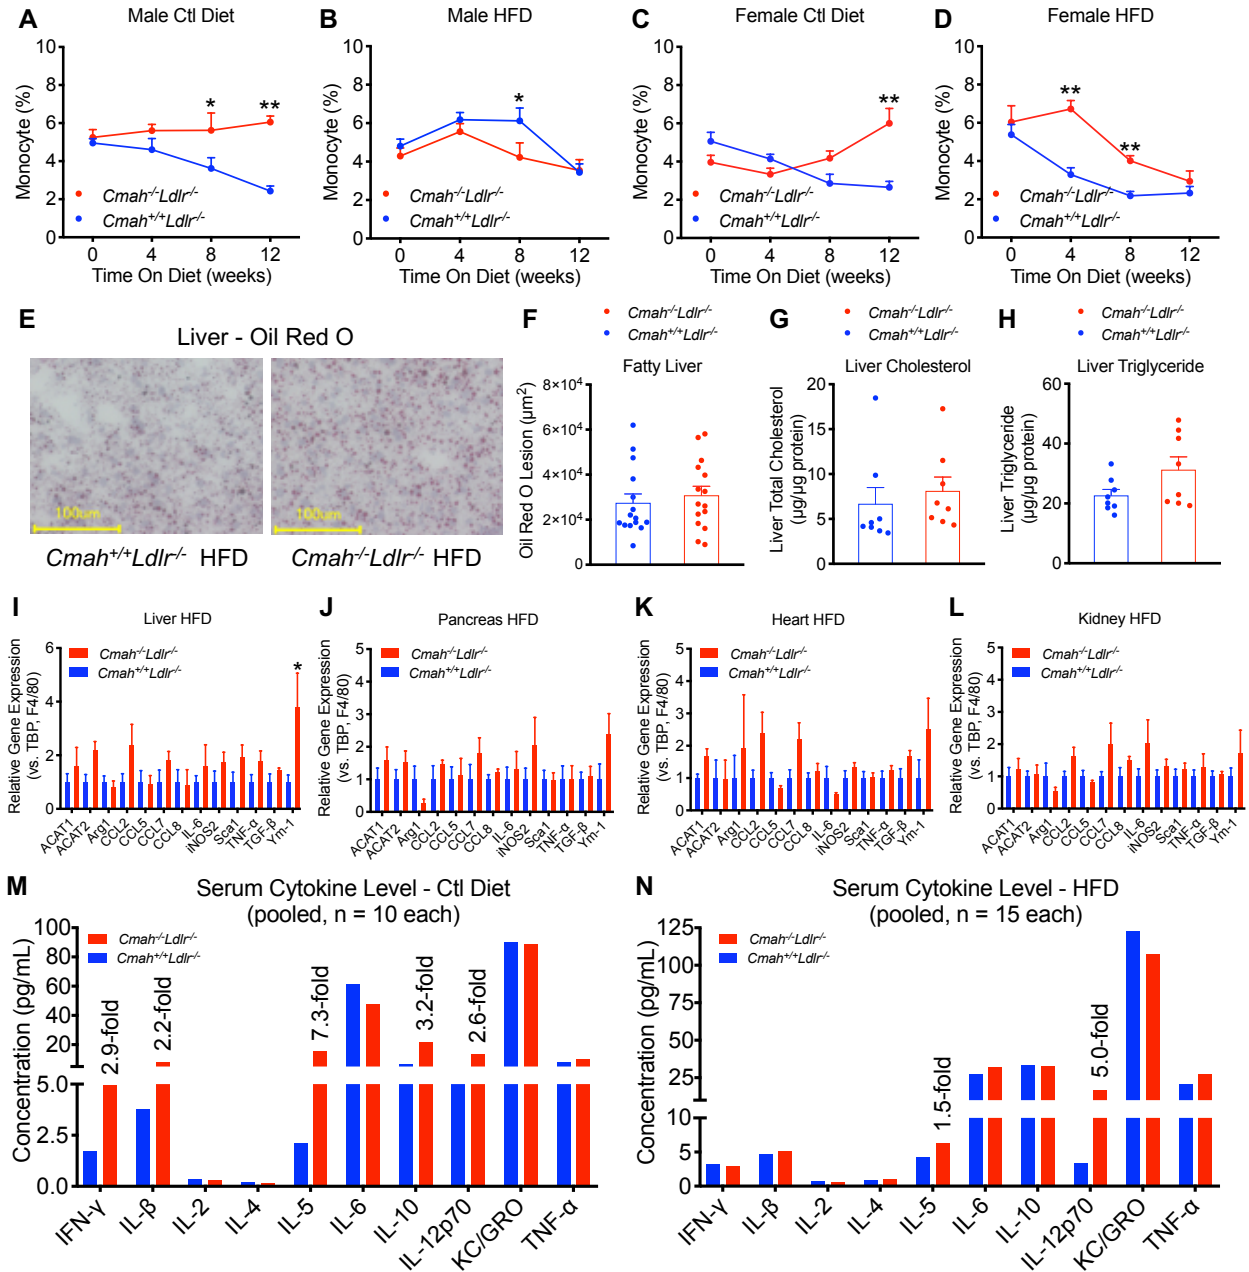

**Fig. S4 Peripheral monocyte population in blood in *Cmah<sup>-/-</sup>Ldlr<sup>-/-</sup>* mice does not affect hepatic steatosis.** (A) - (D) Peripheral monocyte cell population in blood of *Cmah<sup>-/-</sup>Ldlr<sup>-/-</sup>* and *Cmah<sup>+/+</sup>Ldlr<sup>-/-</sup>* mice during control diet or HFD feeding for 12 weeks (male and female, n = 10 each). (E) Representative Images for Oil red O stained liver, (Scale bars, 100 μm.) (F) Oil red O stain positive lesion size, (G) homogenized liver total cholesterol and (H) triglyceride level (normalized with protein concentration) after 12 weeks of HFD feeding (*Cmah<sup>-/-</sup>Ldlr<sup>-/-</sup>* and *Cmah<sup>+/+</sup>Ldlr<sup>-/-</sup>* female mice, n = 8 each). (I) Liver, (J) pancreas, (K) heart, and (L) kidney cytokine expressions after 12 weeks of HFD feeding (female, n = 4 each). (M) Multiplex serum cytokine analysis and concentration after 12 weeks control diet or (N) HFD (pooled female samples from n = 10 or 15 each). Mean values ± SEM, \**P* < 0.05 and \*\**P* < 0.01.

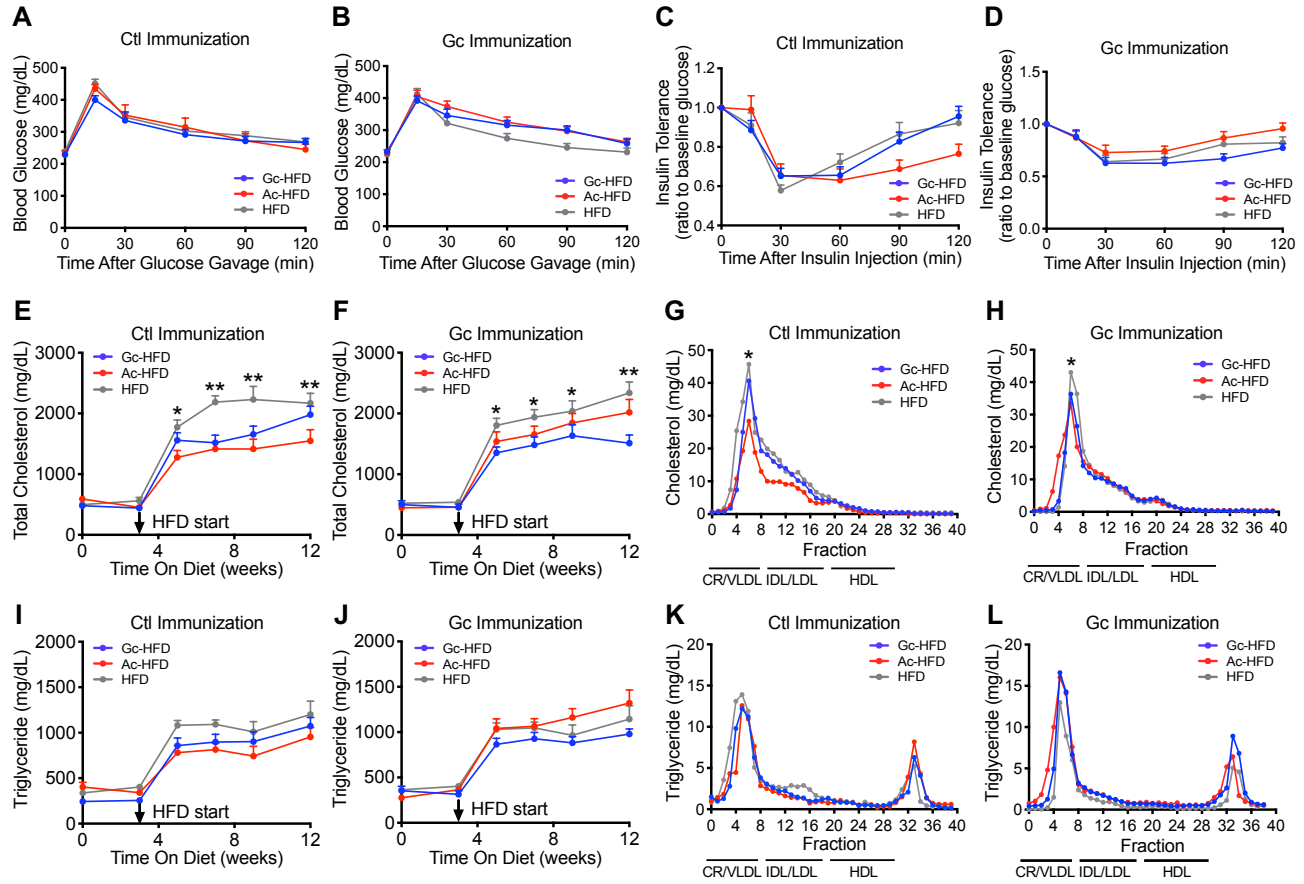

**Fig. S5 Diabetic phenotype and lipid analysis in a xenialitis model using human-like *Cmah<sup>-/-</sup>Ldlr<sup>-/-</sup>* mice.**

*Cmah<sup>-/-</sup>Ldlr<sup>-/-</sup>* mice that were immunized with control or Neu5Gc antigen (Ctl Immunization or Gc Immunization), then fed with Neu5Ac or Neu5Gc or non-Sias high fat diet (Ac-HFD or Gc-HFD or HFD) for 9 weeks (male,  $n = 14 - 16$ ). (A), (B) Glucose tolerance tests, and (C), (D) insulin tolerance tests were performed after 8 weeks of Sias or non-Sias HFD feeding (male,  $n = 10$  each). (E) - (H) Total or lipoprotein analysis on plasma cholesterol or (I) - (L) plasma triglyceride after 9 weeks feeding (pooled from male,  $n = 14 - 16$ ), chylomicron, CR; very-low-density lipoprotein, VLDL; intermediate density lipoprotein, IDL; low-density lipoprotein, LDL; high-density lipoprotein, HDL. Mean values  $\pm$  SEM, \* $P < 0.05$  and \*\* $P < 0.01$ .

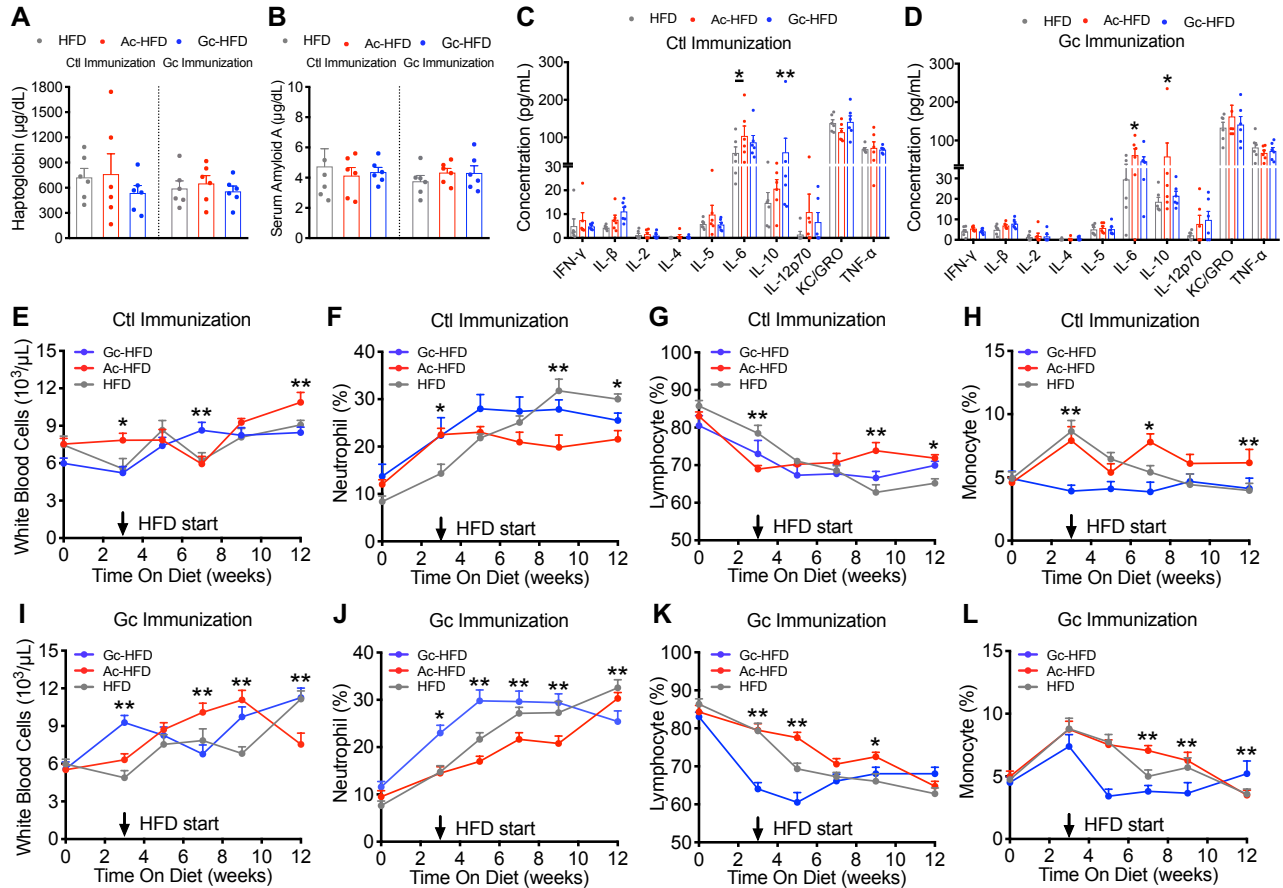

**Fig. S6 Serum cytokine levels and inflammatory cell population in a xenosialitis model.**

(A) Serum haptoglobin, and (B) amyloid A in serum of *Cmah<sup>-/-</sup>Ldlr<sup>-/-</sup>* mice that were immunized with control or Neu5Gc antigen (Ctl Immunization or Gc Immunization), then fed with Neu5Ac or Neu5Gc or non-Sias high fat diet (Ac-HFD or Gc-HFD or HFD) for 9 weeks (male, n = 6 each). (C), (D) Multiplex cytokine profiling in serum samples after 9 weeks HFD feeding (male, n = 6 each). (E) - (L) Peripheral white blood cell population in blood during immunization (0 - 3weeks) and HFD feeding (3 - 12weeks) (male, n = 10 each). Mean values ± SEM, \**P* < 0.05 and \*\**P* < 0.01.

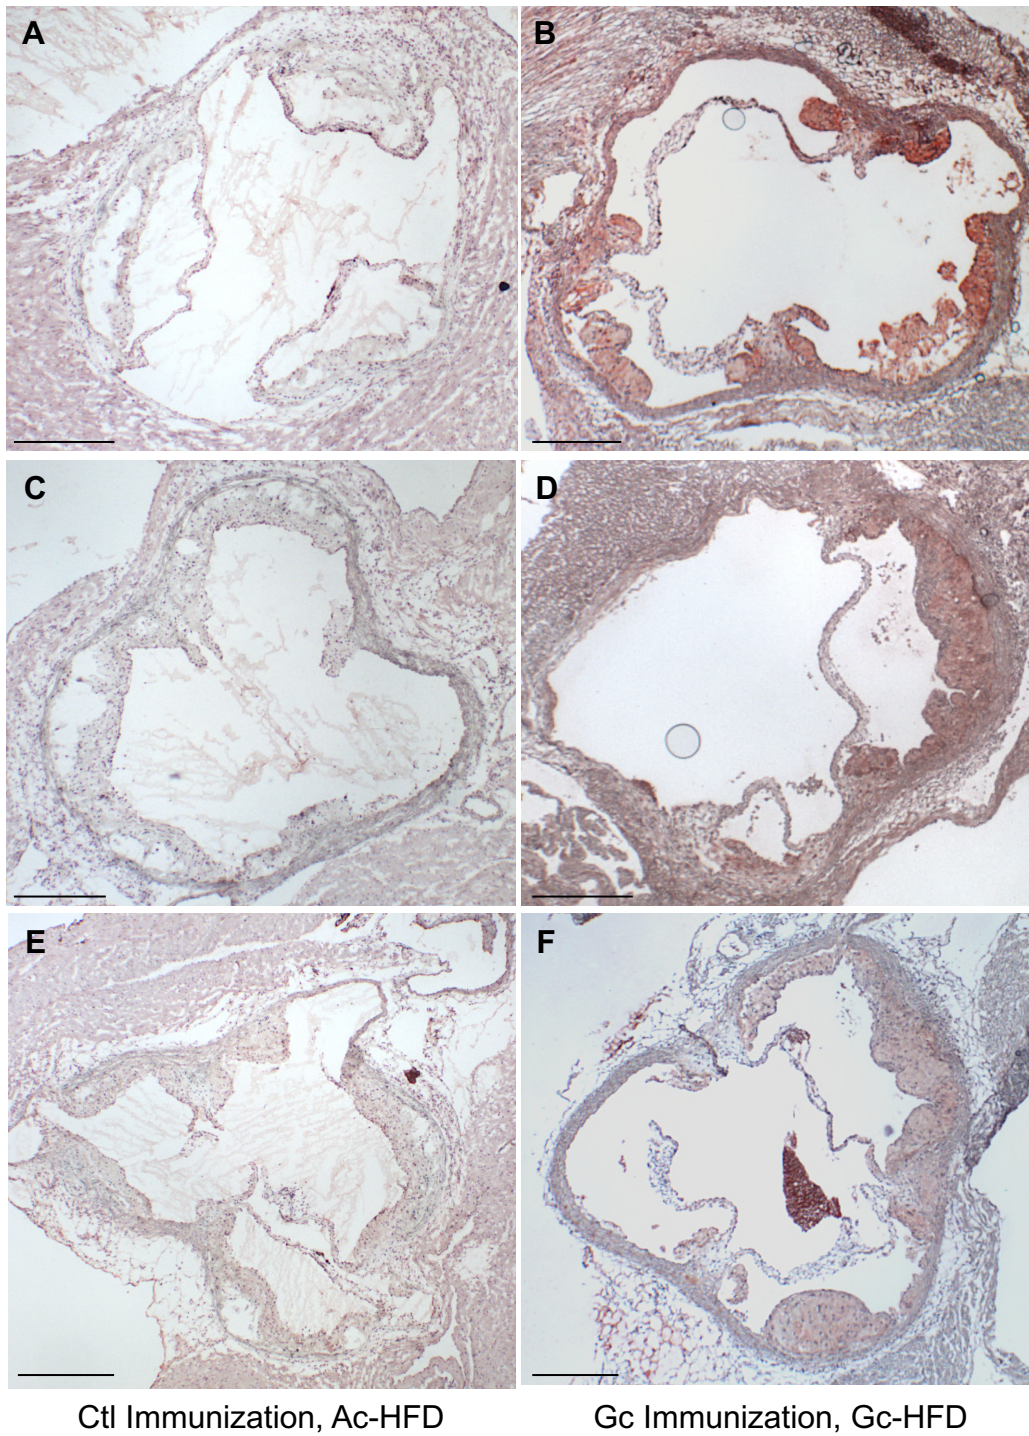

**Fig. S7 Neu5Gc accumulation occurs in atheroma lesion in a xenosialitis model as human atheroma.** *Cmah<sup>-/-</sup>Ldlr<sup>-/-</sup>* male mice that were immunized with control or Neu5Gc antigen (Ctl or Gc Immunization), then fed with Neu5Ac or Neu5Gc high fat diet (Ac-HFD or Gc-HFD) for 9 weeks (n = 3 each). Immunohistochemistry images for Neu5Gc: (A), (C), (E) Ctl immunized then Ac-HFD fed mice; (B), (D), (F) Gc Immunized then Gc-HFD fed mice. (Scale bars, 300  $\mu$ m.)



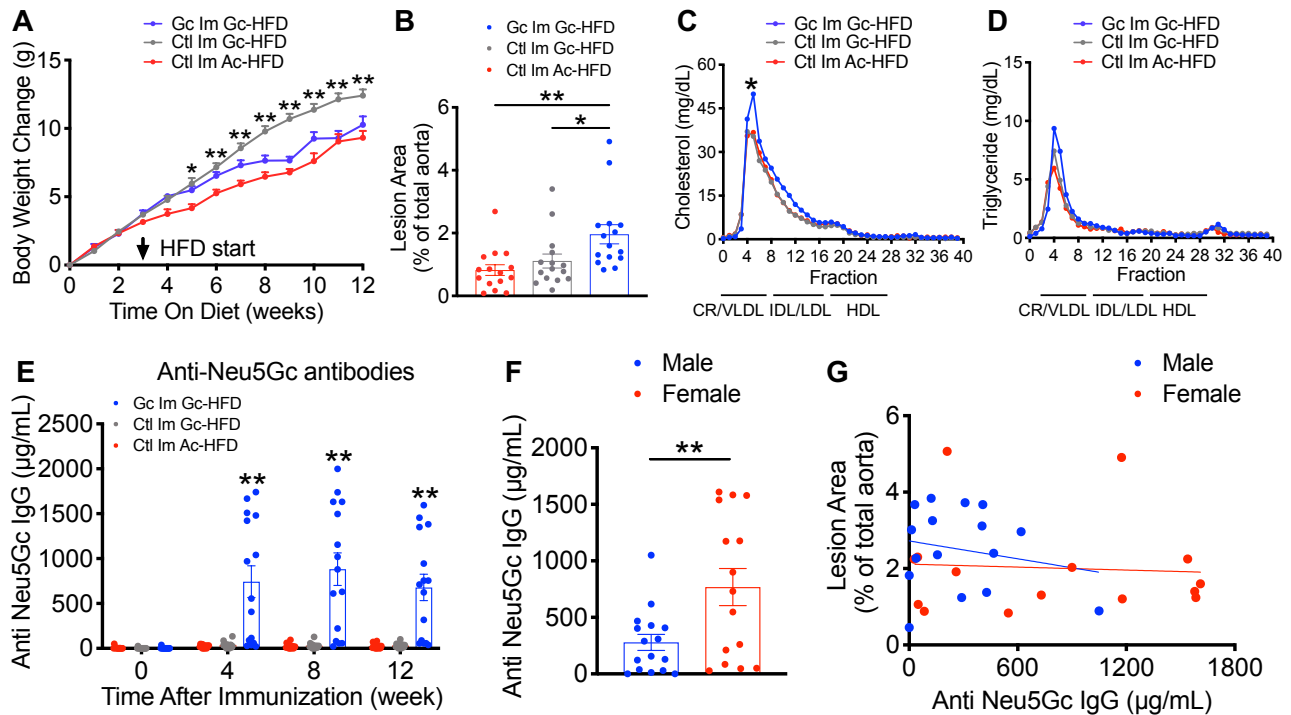

**Fig. S8 Combination of human-like anti-Neu5Gc antibodies and Neu5Gc-HFD increases atherosclerosis in female as well as male.**

*Cmah<sup>-/-</sup>Ldlr<sup>-/-</sup>* female mice that were immunized with control or Neu5Gc antigen (Ctl Im or Gc Im), then fed with Neu5Ac or Neu5Gc high fat diet (Ac-HFD or Gc-HFD) for 9 weeks ( $n = 15$  each). **(A)** Body weight change for 12 weeks (HFD started 3rd weeks, arrow) in three groups. **(B)** En face analysis of atherosclerosis in 12 weeks HFD feeding, **(C)**, **(D)** FPLC analysis of lipoproteins after 12 weeks of HFD diet feeding (pooled serum from  $n = 15$ ), chylomicron, CR; very-low-density lipoprotein, VLDL; intermediate density lipoprotein, IDL; low-density lipoprotein, LDL; high-density lipoprotein, HDL. **(E)** Anti-Neu5Gc antibodies titer measured with bovine submaxillary mucin coated ELISA in *Cmah<sup>-/-</sup>Ldlr<sup>-/-</sup>* female mice ( $n = 15$  each). **(F)** Average titer of anti-Neu5Gc antibodies for *Cmah<sup>-/-</sup>Ldlr<sup>-/-</sup>* male ( $n = 16$ ) and female ( $n = 15$ ) mice that were immunized with Neu5Gc antigen (Gc Im), then fed with Neu5Gc high fat diet (Gc-HFD) for 9 weeks. Average titer was calculated from anti-Neu5Gc IgG ( $\mu\text{g/mL}$ ) in 4, 8, and 12 weeks after Neu5Gc immunization. **(G)** Association between average titer of anti-Neu5Gc IgG (x-axis) and atheroma lesion size measured by en face analysis (y-axis). Mean values  $\pm$  SEM,  $*P < 0.05$  and  $**P < 0.01$ .

**Table. S1 qPCR Primers**

| Gene                 | Forward primer (5'-3')        | Reverse primer (5'-3')         |
|----------------------|-------------------------------|--------------------------------|
| <i>Acat1</i>         | AGCCCAGAAAAATTCATGGACACATACAG | CCCTTGTTCTGGAGGTGCTCTCAGATCTTT |
| <i>Acat2</i>         | GACTTGGTGCAATGGACTCG          | GGTCTTGCTTGTAGAATCTGG          |
| <i>Arg1</i>          | GGAATCTGCATGGGCAACCTGTGT      | AGGGTCTACGTCTCGCAAGCCA         |
| <i>Ccl2 (Mcp--1)</i> | AGGTCCCTGTCATGCTTCTG          | GCTGCTGGTGATCCTCTTGT           |
| <i>Ccl5 (Rantes)</i> | CATATGGCTCGGACACCA            | ACACACTTGGCGGTTCT              |
| <i>Ccl7 (Mcp-3)</i>  | CCTGGGAAGCTGTTATCTTCAA        | TGGAGTTGGGGTTTTTCATGTC         |
| <i>Ccl8 (Mcp-2)</i>  | GCTGTGGTTTTCCAGACCAA          | GAAGGTTCAAGGCTGCAGAA           |
| <i>F4/80</i>         | CTTTGGCTATGGGCTTCCAGTC        | GCAAGGAGGACAGAGTTTATCGTG       |
| <i>Il-6</i>          | CCAGAGATACAAAGAAATGATGG       | ACTCCAGAAGACCAGAGGAAAT         |
| <i>iNos2</i>         | GTTCTCAGCCCAACAATACAAGA       | GTGGACGGGTCGATGTCAC            |
| <i>Sca1 (Ly6A)</i>   | ATGGACACTTCTCACACTACAAAG      | TCAGAGCAAGGTCTGCAGGAGGACTG     |
| <i>Tbp</i>           | GAAGCTGCGGTACAATTCCAG         | CCCCTGTACCCTTCACCAAT           |
| <i>TgFβ</i>          | GGAGAGCCCTGGATACCAAC          | AAGTTGGCATGGTAGCCCTT           |
| <i>Tnfa</i>          | CCAGACCCTCACACTCAGATC         | CACTTGGTGGTTTGCTACGAC          |
